# Supplementary material
Source: ML conference proceedings conference paper supplement (https://proceedings.neurips.cc/paper_files/paper/2015/hash/f60bb6bb4c96d4df93c51bd69dcc15a0-Abstract.html)
Supplement: Supplementary file [file f60bb6bb4c96d4df93c51bd69dcc15a0-Supplemental.zip]

# Accelerated Mirror Descent In Continuous and Discrete Time Supplementary material, NIPS 2015

Walid Krichene      Alexandre Bayen      Peter Bartlett

## 1 Mirror operator $\nabla\psi^*$

In this section, we discuss properties of distance generating functions and their subdifferentials. Let  $\psi$  be a proper, closed, convex function, and suppose that  $\mathcal{X}$  is the effective domain of  $\psi$  (i.e.  $\mathcal{X} = \{x \in \mathbb{R}^n : \psi(x) < \infty\}$ ). The subdifferential of  $\psi$  at  $x \in \mathcal{X}$  is

$$\partial\psi(x) = \{z \in E^* : \psi(y) - \psi(x) - \langle z, y - x \rangle \geq 0 \forall y \in \mathcal{X}\}.$$

The domain of  $\partial\psi$  is  $\{x \in \mathcal{X} : \partial\psi(x) \neq \emptyset\}$ .

The conjugate of  $\psi$  is defined as

$$\psi^*(z) = \sup_{x \in \mathcal{X}} \langle z, x \rangle - \psi(x).$$

By Theorem 12.2 in Rockafellar [1970],  $\psi^*$  is convex, closed and proper. By Theorem 23.5, we have that  $\partial\psi^*$  and  $\partial\psi$  are inverses of each other (in the set valued sense), and

$$\partial\psi^*(z) = \arg \max_{x \in \mathcal{X}} \langle x, z \rangle - \psi(x),$$

so  $\partial\psi^*$  naturally maps into  $\mathcal{X}$ . The following lemma gives sufficient conditions for this mirror operator to be defined on the entire dual space  $E^*$ , and single valued (in other words,  $\psi^*$  is finite and differentiable everywhere).

**Proposition 1.** *Let  $\psi$  and its conjugate  $\psi^*$  be closed proper convex functions, such that the effective domain of  $\psi$  is  $\mathcal{X}$ . Suppose that*

- (i)  *$\psi$  is co-finite, that is, the epigraph of  $\psi$  contains no non-vertical half-lines. (An equivalent condition is that the recession function of  $\psi$  is the indicator of 0.)*
- (ii)  *$\psi$  is essentially strictly convex, that is,  $\psi$  is strictly convex on any convex subset of the domain of  $\partial\psi$ .*

*Then  $\psi^*$  is finite and differentiable on  $E^*$ , and  $\nabla\psi^*$  maps  $E^*$  into  $\mathcal{X}$  via the following expression: for  $z \in E^*$ ,*

$$\nabla\psi^*(z) = \arg \max_{x \in \mathcal{X}} \langle z, x \rangle - \psi(x).$$

*Proof.* Since  $\psi$  is cofinite, by Theorem 13.3 in Rockafellar [1970],  $\psi^*$  is finite everywhere (domain of  $\psi^*$  is  $E^* = \mathbb{R}^n$ ). And since  $\psi$  is essentially strongly convex, by Theorem 25.3 in Rockafellar [1970],  $\psi^*$  is essentially smooth, and hence differentiable on the interior of its domain, which is all of  $E^*$ .  $\square$

Note that  $\psi$  is not necessarily differentiable: consider in particular the case where its domain  $\mathcal{X}$  is contained in a hyperplane (i.e. has affine dimension at most  $n - 1$ ), then  $\psi$  is, in fact, nowhere differentiable. As a consequence, the inverse mapping of  $\nabla\psi^*$ ,  $(\nabla\psi^*)^{-1} = \partial\psi$ , is not always single-valued.

## 2 Proof of Lemma 1

Let us rewrite the smoothed accelerated mirror descent ODE system

$$\begin{cases} \dot{Z} = -\frac{t}{r}\nabla f(X) \\ \dot{X} = \frac{r}{\max(t,\delta)}(\nabla\psi(Z) - X) \\ X(0) = x_0, Z(0) = z_0 \text{ with } \nabla\psi(z_0) = x_0. \end{cases} \quad (1)$$

By the Cauchy-Lipschitz theorem, there exists a unique solution  $(X_\delta, Z_\delta)$  defined on  $[0, t_{\max}]$ , and the solution is  $C^1$ . Define, for  $t > 0$ ,

$$\begin{aligned} A_\delta(t) &= \sup_{u \in [0, t]} \frac{\|\dot{Z}_\delta(u)\|}{u} \\ B_\delta(t) &= \sup_{u \in [0, t]} \frac{\|X_\delta(u) - x_0\|}{u} \\ C_\delta(t) &= \sup_{u \in [0, t]} \|\dot{X}_\delta(u)\| \end{aligned}$$

These quantities are finite for the following reasons:

- $\frac{\|X_\delta(u) - x_0\|}{u} = \|\dot{X}_\delta(0)\| + o(1)$  near 0, thus  $B_\delta$  is finite.
- $\|\dot{X}_\delta\|$  is continuous thus bounded on  $[0, t]$ , thus  $C_\delta$  is finite.
- Finiteness of  $A_\delta$  is a consequence of the following lemma.

To prove Lemma 1, we first need the auxiliary lemma below, that provides bounds on  $A_\delta, B_\delta, C_\delta$ .

**Lemma 3.** *For all  $t$ ,*

$$rA_\delta(t) \leq \|\nabla f(x_0)\| + L_f t B_\delta(t), \quad (2)$$

$$B_\delta(t) \leq \frac{L_{\psi^*} r t}{6} A_\delta(t), \quad (3)$$

$$C_\delta(t) \leq r \left( \frac{t_0 L_{\psi^*}}{2} A_\delta(t) + B_\delta(t) \right). \quad (4)$$

*Proof.* By definition of  $A_\delta$  and  $B_\delta$ , we have

$$\begin{aligned} \|Z_\delta(t) - z_0\| &\leq \int_0^t \|\dot{Z}_\delta(v)\| dv \leq A_\delta(t) \int_0^t v dv = \frac{t^2}{2} A_\delta(t), \\ \|X_\delta(t) - x_0\| &\leq t B_\delta(t). \end{aligned} \quad (5)$$

Now, from the first equation in (6), we have for all  $t \leq t_0$

$$\begin{aligned} r \frac{\|\dot{Z}_\delta(t)\|}{t} &= \|\nabla f(X_\delta(t))\| \\ &\leq \|\nabla f(x_0)\| + \|\nabla f(X_\delta(t)) - \nabla f(x_0)\| \\ &\leq \|\nabla f(x_0)\| + L_f \|X_\delta(t) - x_0\| && \nabla f \text{ is } L_f\text{-Lipschitz} \\ &\leq \|\nabla f(x_0)\| + L_f t B_\delta(t). \end{aligned}$$

Thus,

$$rA_\delta(t) \leq \|\nabla f(x_0)\| + L_f t B_\delta(t).$$

From the second equation in (6), we have for all  $t \leq \delta$ ,

$$e^{\frac{rt}{\delta}} \left( \dot{X}_\delta + \frac{r}{\delta}(X_\delta - x_0) \right) = \frac{r}{\delta} e^{\frac{rt}{\delta}} (\nabla\psi^*(Z_\delta) - \nabla\psi^*(z_0)),$$

i.e.,

$$\frac{d}{dt} \left( (X_\delta(t) - x_0) e^{\frac{rt}{\delta}} \right) = \frac{r}{\delta} e^{\frac{rt}{\delta}} (\nabla\psi^*(Z_\delta(t)) - \nabla\psi^*(z_0)),$$

thus integrating

$$(X_\delta(t) - x_0)e^{\frac{rt}{\delta}} = \frac{r}{\delta} \int_0^t e^{\frac{rs}{\delta}} (\nabla\psi^*(Z_\delta(s)) - \nabla\psi^*(z_0)) ds$$

and taking norms

$$\begin{aligned} \|X_\delta(t) - x_0\| &\leq \frac{r}{\delta} \int_0^t \|\nabla\psi^*(Z_\delta(s)) - \nabla\psi^*(z_0)\| ds \\ &\leq \frac{L_{\psi^*} r}{\delta} \int_0^t \|Z_\delta(s) - z_0\| ds && \nabla\psi^* \text{ is } L_{\psi^*}\text{-Lipschitz} \\ &\leq \frac{L_{\psi^*} r}{\delta} \int_0^t \frac{s^2}{2} A_\delta(t) ds && \text{by (5)} \\ &= \frac{L_{\psi^*} r}{\delta} A_\delta(t) \frac{t^3}{6} \\ &\leq \frac{L_{\psi^*} r t^2}{6} A_\delta(t). \end{aligned}$$

For  $t \geq \delta$ ,

$$t^r \left( \dot{X}_\delta + \frac{r}{t} (X_\delta - x_0) \right) = r t^{r-1} (\nabla\psi^*(Z_\delta) - \nabla\psi^*(z_0)),$$

i.e.

$$\frac{d}{dt} (t^r (X_\delta(t) - x_0)) = r t^{r-1} (\nabla\psi^*(Z_\delta) - \nabla\psi^*(z_0)),$$

thus integrating

$$t^r (X_\delta(t) - x_0) = \int_0^t r s^{r-1} (\nabla\psi^*(Z_\delta(s)) - \nabla\psi^*(z_0)) ds$$

and taking norms

$$\begin{aligned} \|X_\delta(t) - x_0\| &\leq \frac{r}{t} \int_0^t \|\nabla\psi^*(Z_\delta(s)) - \nabla\psi^*(z_0)\| ds \\ &\leq \frac{L_{\psi^*} r}{t} \int_0^t \|Z_\delta(s) - z_0\| ds && \nabla\psi^* \text{ is } L_{\psi^*}\text{-Lipschitz} \\ &\leq \frac{L_{\psi^*} r}{t} \int_0^t \frac{s^2}{2} A_\delta(t) ds && \text{by (5)} \\ &= \frac{L_{\psi^*} r}{t} A_\delta(t) \frac{t^3}{6} \\ &= \frac{L_{\psi^*} r t^2}{6} A_\delta(t). \end{aligned}$$

Dividing by  $t$  and taking the supremum, we have

$$B_\delta(t) \leq \frac{L_{\psi^*} r t}{6} A_\delta(t).$$

Finally, to bound  $C_\delta$ , we have from the second equation in (6), for all  $t \leq t_0$ ,

$$\begin{aligned} \|\dot{X}_\delta(t)\| &= \frac{r}{\max(\delta, t)} \|\nabla\psi^*(Z_\delta(t)) - X_\delta(t)\| \\ &\leq \frac{r}{\max(\delta, t)} (\|\nabla\psi^*(Z_\delta(t)) - \nabla\psi^*(z_0)\| + \|X_\delta(t) - x_0\|) \\ &\leq \frac{r}{\max(\delta, t)} (L_{\psi^*} \|Z_\delta(t) - z_0\| + \|X_\delta(t) - x_0\|) \\ &\leq \frac{r}{\max(\delta, t)} \left( \frac{t^2}{2} L_{\psi^*} A_\delta(t) + t B_\delta(t) \right) \\ &\leq r \left( \frac{L_{\psi^*} t_0}{2} A_\delta(t) + B_\delta(t) \right), \end{aligned}$$

which conclude the proof.  $\square$

*Proof of Lemma 1.* First, we show that  $A_\delta, B_\delta, C_\delta$  are bounded on  $[0, t_0]$ , uniformly in  $\delta$ .

Combining (2) and (3), we have

$$B_\delta(t) \frac{6}{L_{\psi^*} t} \leq r A_\delta(t) \leq \|\nabla f(x_0)\| + L_f t B_\delta(t)$$

thus

$$B_\delta(t) \left( \frac{6}{L_{\psi^*} t} - L_f t \right) \leq \|\nabla f(x_0)\|.$$

And when  $t \leq \alpha \sqrt{\frac{6}{L_f L_{\psi^*}}}$ ,

$$\frac{6}{L_{\psi^*} t} - L_f t \geq \sqrt{\frac{6L_f}{L_{\psi^*}}} \left( \frac{1}{\alpha} - \alpha \right)$$

and for  $\alpha = \sqrt{\frac{2}{3}}$ ,  $\frac{1}{\alpha} - \alpha = \frac{1}{\sqrt{6}}$ , thus setting

$$t_0 = \sqrt{\frac{2}{3}} \sqrt{\frac{6}{L_f L_{\psi^*}}} = \frac{2}{\sqrt{L_f L_{\psi^*}}}$$

we have for all  $t \leq t_0$ ,  $\frac{6}{L_{\psi^*} t} - L_f t \geq \sqrt{\frac{L_f}{L_{\psi^*}}}$ , and so

$$B_\delta(t_0) \leq \sqrt{\frac{L_{\psi^*}}{L_f}} \|\nabla f(x_0)\|.$$

By (2),

$$\begin{aligned} A_\delta(t_0) &\leq \frac{1}{r} (\|\nabla f(x_0)\| + L_f t_0 B_\delta(t_0)) \\ &\leq \frac{1}{r} \left( \|\nabla f(x_0)\| + L_f \frac{2}{\sqrt{L_f L_{\psi^*}}} \|\nabla f(x_0)\| \sqrt{\frac{L_{\psi^*}}{L_f}} \right) \\ &= \frac{3}{r} \|\nabla f(x_0)\|. \end{aligned}$$

By (4), we have

$$\begin{aligned} C_\delta(t_0) &\leq r \left( \frac{t_0 L_{\psi^*}}{2} A_\delta(t_0) + B_\delta(t_0) \right) \\ &\leq r \left( \frac{2}{\sqrt{L_f L_{\psi^*}}} \frac{L_{\psi^*}}{2} \frac{3}{r} \|\nabla f(x_0)\| + \sqrt{\frac{L_{\psi^*}}{L_f}} \|\nabla f(x_0)\| \right) \\ &= (3 + r) \|\nabla f(x_0)\| \sqrt{\frac{L_{\psi^*}}{L_f}} \end{aligned}$$

To conclude, we have for all  $t \in [0, t_0]$

$$\begin{aligned} \|\dot{Z}_\delta(t)\| &\leq t_0 A_\delta(t_0), \\ \|\dot{X}_\delta(t)\| &\leq C_\delta(t_0), \end{aligned}$$

which are bounded uniformly in  $\delta$ , thus the family is equi-Lipschitz-continuous on  $[0, t_0]$ . It also follows that it is uniformly bounded on the same interval.  $\square$

### 3 Proof of uniqueness of the solution

*Proof of uniqueness.* It suffices to prove uniqueness on an open neighborhood of 0, since away from 0, uniqueness is guaranteed by the Cauchy-Lipschitz theorem.

Let  $(X, Z)$  and  $(\bar{X}, \bar{Z})$  be two solutions of the ODE (5), and let  $\Delta_Z = Z - \bar{Z}$  and  $\Delta_X = X - \bar{X}$ . Then  $\Delta_X, \Delta_Z$  are  $C^1$ , and we have

$$\begin{cases} \dot{\Delta}_Z = -\frac{t}{r} (\nabla f(X) - \nabla f(\bar{X})) \\ \dot{\Delta}_X = \frac{r}{t} (\nabla \psi^*(Z) - \nabla \psi^*(\bar{Z}) - \Delta_X) \\ \Delta_Z(0) = \Delta_X(0) = 0 \end{cases}$$

Let  $A(t) = \sup_{[0,t]} \frac{\|\dot{\Delta}_Z(u)\|}{u}$ , and  $B(t) = \sup_{[0,t]} \|\Delta_X\|$ . Note that  $B(t)$  is finite since  $\Delta_X$  is continuous on  $[0, t]$ . The finiteness of  $A(t)$  will be established below. We have

$$\|\dot{\Delta}_Z(t)\| = \frac{t}{r} \|\nabla f(X(t)) - \nabla f(\bar{X}(t))\| \leq \frac{L_f t}{r} \|\Delta_X(t)\| \leq \frac{L_f t}{r} B(t).$$

Dividing by  $t$  and taking the supremum, we have

$$A(t) \leq \frac{L_f}{r} B(t). \quad (6)$$

Next, since  $\dot{\Delta}_X + \frac{r}{t} \Delta_X = \frac{r}{t} (\nabla \psi^*(Z) - \nabla \psi^*(\bar{Z}))$ , we have  $\frac{d}{dt} t^r \Delta_X = r t^{r-1} (\nabla \psi^*(Z) - \nabla \psi^*(\bar{Z}))$ . Therefore, integrating and taking norms

$$\begin{aligned} t^r \|\Delta_X(t)\| &\leq r \int_0^t s^{r-1} \|\nabla \psi^*(Z(s)) - \nabla \psi^*(\bar{Z}(s))\| ds \leq r t^{r-1} \int_0^t L_{\psi^*} \|\Delta_Z(s)\| ds \\ &\leq L_{\psi^*} r t^{r-1} A(t) \int_0^t \frac{s^2}{2} ds = \frac{L_{\psi^*} r t^{r+2} A(t)}{6}, \end{aligned}$$

where we used the fact that  $\|\Delta_Z(s)\| = \|\int_0^s \dot{\Delta}_Z(u) du\| \leq \int_0^s u A(t) du = A(t) \frac{s^2}{2}$ . Dividing by  $t^r$  and taking the supremum,

$$B(t) \leq \frac{L_{\psi^*} r t^2}{6} A(t). \quad (7)$$

Combining (6) and (7), we have  $A(t) \leq \frac{L_f L_{\psi^*} t^2}{6} A(t)$ , which implies that  $A(t) = 0$  for  $t < \sqrt{\frac{6}{L_{\psi^*} L_f}}$ , which in turn implies that  $B(t) = 0$ . This concludes the proof.  $\square$

## 4 Proof of Lemma 2

We recall the accelerated mirror descent algorithm, the definition of the potential function, and the statement of the Lemma.

---

**Algorithm 1** Accelerated mirror descent with distance generating functions  $\psi^*$  and  $\phi$ , step size  $s$ , and parameter  $r \geq 3$

---

- 1: Initialize  $\tilde{x}^{(0)} = \tilde{z}^{(0)} = x_0$ .
  - 2: **for**  $k \in \mathbb{N}$  **do**
  - 3:  $x^{(k+1)} = \lambda_k \tilde{z}^{(k)} + (1 - \lambda_k) \tilde{x}^{(k)}$ , with  $\lambda_k = \frac{r}{r+k}$
  - 4:  $\tilde{z}^{(k+1)} = \arg \min_{\tilde{z} \in E} \frac{ks}{r} \langle \nabla f(x^{(k+1)}), \tilde{z} \rangle + D_\psi(\tilde{z}, \tilde{z}^{(k)}) = \nabla \psi^*(\nabla \psi(\tilde{z}^{(k)}) - \frac{ks}{r} \nabla f(x^{(k+1)}))$
  - 5:  $\tilde{x}^{(k+1)} = \arg \min_{\tilde{x} \in E} \gamma s \langle \nabla f(x^{(k+1)}), \tilde{x} \rangle + R(\tilde{x}, x^{(k+1)})$
  - 6: **end for**
- 

We consider the function

$$\tilde{E}^{(k)} = V(\tilde{x}^{(k)}, z^{(k)}, k) = \frac{k^2 s}{r} (f(\tilde{x}^{(k)}) - f^*) + r D_{\psi^*}(z^{(k)}, z^*).$$

**Lemma 2.** *If  $\gamma \geq L_R L_{\psi^*}$  and  $s \leq \frac{\ell_R}{2L_f \gamma}$ , then for all  $k \geq 0$ ,*

$$\tilde{E}^{(k+1)} - \tilde{E}^{(k)} \leq \frac{(2k+1-kr)s}{r} (f(\tilde{x}^{(k+1)}) - f^*).$$

In what follows,  $\psi^*$  is a distance generating function that is finite and differentiable throughout  $E^*$ , and  $\nabla \psi^*$  maps  $E^*$  into  $\mathcal{X}$ , and is supposed to be  $L_{\psi^*}$ -Lipschitz in the following sense:  $\|\nabla \psi^*(u) - \nabla \psi^*(v)\| \leq L_{\psi^*} \|u - v\|_*$  for all  $u, v \in E^*$ . The dual function  $\psi$  has effective domain  $\mathcal{X}$  but is not necessarily differentiable. We will need the following lemmas:

**Lemma 4.** *Let  $f$  be a convex function and suppose that  $\nabla f$  is  $L_f$ -Lipschitz w.r.t.  $\|\cdot\|$ . Then for all  $x, x', x^+$ ,*

$$f(x^+) \leq f(x') + \langle \nabla f(x), x^+ - x' \rangle + \frac{L_f}{2} \|x^+ - x'\|^2$$

*Proof.* Since  $\nabla f$  is  $L_f$ -Lipschitz, we have

$$f(x^+) \leq f(x) + \langle \nabla f(x), x^+ - x \rangle + \frac{L_f}{2} \|x^+ - x\|^2$$

and by convexity of  $f$ ,

$$f(x') \geq f(x) + \langle \nabla f(x), x' - x \rangle$$

Summing the two inequalities, we obtain the result.  $\square$

**Lemma 5.** *For all  $u, v, w$*

$$D_{\psi^*}(u, v) - D_{\psi^*}(w, v) = -D_{\psi^*}(w, u) + \langle \nabla \psi^*(u) - \nabla \psi^*(v), u - w \rangle$$

*Proof.* By definition of the Bregman divergence, we have

$$\begin{aligned} & D_{\psi^*}(u, v) - D_{\psi^*}(w, v) \\ &= \psi^*(u) - \psi^*(v) - \langle \nabla \psi^*(v), u - v \rangle - (\psi^*(w) - \psi^*(v) - \langle \nabla \psi^*(v), w - v \rangle) \\ &= \psi^*(u) - \psi^*(w) - \langle \nabla \psi^*(v), u - w \rangle \\ &= -(\psi^*(w) - \psi^*(u) - \langle \nabla \psi^*(u), w - u \rangle) + \langle \nabla \psi^*(u) - \nabla \psi^*(v), u - w \rangle \\ &= -D_{\psi^*}(w, u) + \langle \nabla \psi^*(u) - \nabla \psi^*(v), u - w \rangle \end{aligned}$$

$\square$

**Lemma 6.** For all  $u, v \in E^*$ ,

$$\frac{1}{2L_{\psi^*}} \|\tilde{u} - \tilde{v}\|^2 \leq D_{\psi^*}(u, v) \leq \frac{L_{\psi^*}}{2} \|u - v\|_*^2$$

where  $\tilde{u} = \nabla\psi^*(u)$  and  $\tilde{v} = \nabla\psi^*(v)$ .

*Proof.* We have

$$\begin{aligned} D_{\psi^*}(u, v) &= \psi^*(u) - \psi^*(v) - \langle \nabla\psi^*(v), u - v \rangle \\ &= \int_0^1 \nabla \langle \psi^*(v + t(u - v)) - \nabla\psi^*(v), u - v \rangle dt \\ &\leq \|u - v\|_* \int_0^1 \|\psi^*(v + t(u - v)) - \nabla\psi^*(v)\| dt \quad \text{by the Cauchy-Schwartz inequality} \\ &\leq L_{\psi^*} \|u - v\|_* \int_0^1 \|v + t(u - v) - v\|_* dt \quad \text{since } \psi^* \text{ is } L_{\psi^*} \text{ Lipschitz} \\ &= L_{\psi^*} \|u - v\|_*^2 \int_0^1 t dt \end{aligned}$$

which proves the second inequality. The first inequality will be proved by dualizing this inequality. Fix  $v \in E^*$  and define

$$\begin{aligned} h(u) &= D_{\psi^*}(u, v) = \psi^*(u) - \psi^*(v) - \langle \nabla\psi^*(v), u - v \rangle, \\ d(u) &= \frac{L_{\psi^*}}{2} \|u - v\|_*^2. \end{aligned}$$

Then by the previous inequality,  $h(u) \leq d(u)$  for all  $u \in E^*$ , and taking duals, we have  $h^*(u^*) \geq d^*(u^*)$  for all  $u^*$ . We now derive the duals. Let  $\tilde{v} = \nabla\psi^*(v)$ . Then,

$$\begin{aligned} h^*(u^*) &= \sup_u \langle u^*, u \rangle - h(u) \\ &= \sup_u \langle u^*, u \rangle - \psi^*(u) + \psi^*(v) + \langle \tilde{v}, u - v \rangle \\ &= \psi^*(v) - \langle v, \tilde{v} \rangle + \sup_u \langle u^* + \tilde{v}, u \rangle - \psi^*(u) \\ &= \psi^*(v) - \langle v, \tilde{v} \rangle + \psi(u^* + \tilde{v}) \end{aligned}$$

and

$$\begin{aligned} d^*(u^*) &= \sup_u \langle u^*, u \rangle - d(u) \\ &= \sup_u \langle u^*, u \rangle - \frac{L_{\psi^*}}{2} \|u - v\|_*^2 \\ &= \sup_w \langle u^*, v + w \rangle - \frac{L_{\psi^*}}{2} \|w\|_*^2 \\ &= \langle u^*, v \rangle + \sup_w \langle u^*, w \rangle - \frac{L_{\psi^*}}{2} \|w\|_*^2 \\ &= \langle u^*, v \rangle + \frac{1}{2L_{\psi^*}} \|u^*\|^2 \end{aligned}$$

where the last equality uses Cauchy-Schwartz. Therefore combining the two inequalities,

$$\psi^*(v) - \langle v, u^* + \tilde{v} \rangle + \psi(u^* + \tilde{v}) \geq \frac{1}{2L_{\psi^*}} \|u^*\|^2$$

In particular, for all  $u \in E^*$ , if we call  $\tilde{u} = \nabla\psi^*(u)$ , and take  $u^* = \tilde{u} - \tilde{v}$ , then

$$\psi^*(v) - \langle v, \tilde{u} \rangle + \psi(\tilde{u}) \geq \frac{1}{2L_{\psi^*}} \|\tilde{u} - \tilde{v}\|^2$$

and by Theorem 23.5 in Rockafellar,  $\psi(\tilde{u}) = \langle u, \tilde{u} \rangle - \psi^*(\tilde{u})$ , thus

$$\psi^*(v) - \psi^*(u) - \langle \tilde{u}, v - u \rangle \geq \frac{1}{2L_{\psi^*}} \|\tilde{u} - \tilde{v}\|^2$$

which proves the claim.  $\square$

*Proof of Lemma 2.* We start by bounding the difference in Bregman divergences

$$\begin{aligned} & D_{\psi^*}(z^{(k+1)}, z^*) - D_{\psi^*}(z^{(k)}, z^*) \\ &= -D_{\psi^*}(z^{(k)}, z^{(k+1)}) + \left\langle \nabla \psi^*(z^{(k+1)}) - \nabla \psi^*(z^*), z^{(k+1)} - z^{(k)} \right\rangle \quad \text{By Lemma 5} \\ &\leq -\frac{1}{2L_{\psi^*}} \|\tilde{z}^{(k+1)} - \tilde{z}^{(k)}\|^2 + \left\langle \tilde{z}^{(k+1)} - x^*, -\frac{kS}{r} \nabla f(x^{(k+1)}) \right\rangle \quad \text{by Lemma 6.} \end{aligned} \tag{8}$$

Now using the step from  $x^{(k+1)}$  to  $\tilde{x}^{(k+1)}$ , we have

$$\tilde{x}^{(k+1)} = \arg \min_{x \in E} \left\langle \nabla f(x^{(k+1)}), x \right\rangle + \frac{1}{\gamma_S} R(x, x^{(k+1)})$$

with  $\frac{\ell_R}{2} \|x - y\|^2 \leq R(x, y) \leq \frac{L_R}{2} \|x - y\|^2$ . Therefore, for any  $x$ ,  $R(x, x^{(k+1)}) \geq R(\tilde{x}^{(k+1)}, x^{(k+1)}) + \gamma_S \langle \nabla f(x^{(k+1)}), \tilde{x}^{(k+1)} - x \rangle$ . We can write

$$\tilde{z}^{(k+1)} - \tilde{z}^{(k)} = \frac{1}{\lambda_k} \left( \lambda_k \tilde{z}^{(k+1)} + (1 - \lambda_k) \tilde{x}^{(k)} - x^{(k+1)} \right) = \frac{1}{\lambda_k} \left( d^{(k+1)} - x^{(k+1)} \right),$$

where we have defined  $d^{(k+1)}$  in the obvious way. Thus

$$\begin{aligned} & \|\tilde{z}^{(k+1)} - \tilde{z}^{(k)}\|^2 \\ &= \frac{1}{\lambda_k^2} \|d^{(k+1)} - x^{(k+1)}\|^2 \\ &\geq \frac{1}{\lambda_k^2} \frac{2}{L_R} R(d^{(k+1)}, x^{(k+1)}) \\ &\geq \frac{1}{\lambda_k^2} \frac{2}{L_R} \left( R(\tilde{x}^{(k+1)}, x^{(k+1)}) + \gamma_S \left\langle \nabla f(x^{(k+1)}), \tilde{x}^{(k+1)} - d^{(k+1)} \right\rangle \right) \\ &\geq \frac{1}{\lambda_k^2} \frac{2}{L_R} \left( \frac{\ell_R}{2} \|\tilde{x}^{(k+1)} - x^{(k+1)}\|^2 + \gamma_S \left\langle \nabla f(x^{(k+1)}), \tilde{x}^{(k+1)} - \lambda_k \tilde{z}^{(k+1)} - (1 - \lambda_k) \tilde{x}^{(k)} \right\rangle \right). \end{aligned}$$

Thus

$$\begin{aligned} & \lambda_k \frac{kL_R}{2r\gamma} \|\tilde{z}^{(k+1)} - \tilde{z}^{(k)}\|^2 \geq \frac{k\ell_R}{2r\lambda_k\gamma} \|\tilde{x}^{(k+1)} - x^{(k+1)}\|^2 \\ & \quad + \left\langle \frac{kS}{r} \nabla f(x^{(k+1)}), \frac{1}{\lambda_k} \tilde{x}^{(k+1)} - \tilde{z}^{(k+1)} - \frac{1 - \lambda_k}{\lambda_k} \tilde{x}^{(k)} \right\rangle. \end{aligned} \tag{9}$$

Subtracting (9) from (8),

$$\begin{aligned} & D_{\psi^*}(z^{(k+1)}, z^*) - D_{\psi^*}(z^{(k)}, z^*) \\ &\leq -\alpha_k \|\tilde{z}^{(k+1)} - \tilde{z}^{(k)}\|^2 - \frac{k\ell_R}{2r\lambda_k\gamma} \|\tilde{x}^{(k+1)} - x^{(k+1)}\|^2 \\ & \quad + \left\langle -\frac{kS}{r} \nabla f(x^{(k+1)}), -x^* + \frac{1}{\lambda_k} \tilde{x}^{(k+1)} - \frac{1 - \lambda_k}{\lambda_k} \tilde{x}^{(k)} \right\rangle, \end{aligned}$$

where

$$\alpha_k = \frac{1}{2L_{\psi^*}} - \frac{k\lambda_k L_R}{2r\gamma}.$$



Defining  $D_1^{(k+1)} = \|\tilde{x}^{(k+1)} - x^{(k+1)}\|^2$  and  $D_2^{(k+1)} = \|\tilde{z}^{(k+1)} - \tilde{z}^{(k)}\|^2$ , we can rewrite the last inequality as

$$\begin{aligned} & D_{\psi^*}(z^{(k+1)}, z^*) - D_{\psi^*}(z^{(k)}, z^*) \\ &= -\alpha_k D_2^{(k+1)} - \frac{k\ell_R}{2r\lambda_k\gamma} D_1^{(k+1)} + \frac{sk}{r} \left\langle -\nabla f(x^{(k+1)}), \tilde{x}^{(k+1)} - x^* \right\rangle \\ & \quad + \frac{1-\lambda_k}{\lambda_k} \frac{sk}{r} \left\langle -\nabla f(x^{(k+1)}), \tilde{x}^{(k+1)} - \tilde{x}^{(k)} \right\rangle \end{aligned}$$

By Lemma 4, we can bound the inner products as follows

$$\begin{aligned} \left\langle \tilde{x}^{(k+1)} - \tilde{x}^{(k)}, -\nabla f(x^{(k+1)}) \right\rangle &\leq f(\tilde{x}^{(k)}) - f(\tilde{x}^{(k+1)}) + \frac{L_f}{2} D_1^{(k+1)}, \\ \left\langle \tilde{x}^{(k+1)} - x^*, -\nabla f(x^{(k+1)}) \right\rangle &\leq f^* - f(\tilde{x}^{(k+1)}) + \frac{L_f}{2} D_1^{(k+1)}. \end{aligned}$$

Combining these inequalities, and using the fact that  $\frac{1-\lambda_k}{\lambda_k} = \frac{k}{r}$ , we have

$$\begin{aligned} & D_{\psi^*}(z^{(k+1)}, z^*) - D_{\psi^*}(z^{(k)}, z^*) \\ &\leq -\alpha_k D_2^{(k+1)} + \frac{k^2 s}{r^2} \left( f(\tilde{x}^{(k)}) - f(\tilde{x}^{(k+1)}) + \frac{L_f}{2} D_1^{(k+1)} \right) + \frac{ks}{r} \left( f^* - f(\tilde{x}^{(k+1)}) + \frac{L_f}{2} D_1^{(k+1)} \right) \\ & \quad - \frac{k\ell_R}{2r\lambda_k\gamma} D_1^{(k+1)} \\ &= \frac{k^2 s}{r^2} \left( f(\tilde{x}^{(k)}) - f(\tilde{x}^{(k+1)}) \right) + \frac{ks}{r} \left( f^* - f(\tilde{x}^{(k+1)}) \right) - \alpha_k D_2^{(k+1)} - \beta_k D_1^{(k+1)}, \end{aligned}$$

where

$$\beta_k = \frac{k\ell_R}{2r\lambda_k\gamma} - \frac{L_f k^2 s}{2r^2} - \frac{L_f ks}{2r}.$$

Finally, we obtain a bound on the difference  $\tilde{E}^{(k+1)} - \tilde{E}^{(k)}$

$$\begin{aligned} & \tilde{E}^{(k+1)} - \tilde{E}^{(k)} \\ &= \frac{(k+1)^2 s}{r} (f(\tilde{x}^{(k+1)}) - f^*) - \frac{k^2 s}{r} (f(\tilde{x}^{(k)}) - f^*) + r(D_{\psi^*}(z^{(k+1)}, z^*) - D_{\psi^*}(z^{(k)}, z^*)) \\ &= \frac{k^2 s}{r} (f(\tilde{x}^{(k+1)}) - f(\tilde{x}^{(k)})) + \frac{(2k+1)s}{r} (f(\tilde{x}^{(k+1)}) - f^*) + r(D_{\psi^*}(z^{(k+1)}, z^*) - D_{\psi^*}(z^{(k)}, z^*)) \\ &\leq \frac{(2k+1-kr)s}{r} (f(\tilde{x}^{(k+1)}) - f^*) - r\alpha_k D_2^{(k+1)} - r\beta_k D_1^{(k+1)} \end{aligned}$$

For the desired inequality to hold, it suffices that  $\alpha_k, \beta_k \geq 0$ , i.e.

$$\begin{aligned} \frac{1}{2L_{\psi^*}} - \frac{kL_R}{2(r+k)\gamma} &\geq 0 \\ \frac{k(r+k)\ell_R}{2r^2\gamma} - \frac{L_f k^2 s}{2r^2} - \frac{L_f ks}{2r} &\geq 0, \end{aligned}$$

i.e.

$$\begin{aligned} \gamma &\geq \frac{kr}{kr+r^2} L_R L_{\psi^*} \\ s &\leq \frac{\ell_R}{L_f \gamma}. \end{aligned}$$

So it is sufficient that

$$\gamma \geq L_R L_{\psi^*} \qquad s \leq \frac{\ell_R}{L_f \gamma}$$

which concludes the proof.  $\square$

## 5 Bounding $\tilde{E}^{(1)}$

Here we derive the bound on  $\tilde{E}^{(1)}$  that is used in Theorem 3. Suppose the assumptions of Theorem 3 hold. Then by Lemma 2, we have

$$\begin{aligned}\tilde{E}^{(1)} &\leq \tilde{E}^{(0)} + \frac{s}{r}(f(\tilde{x}^{(1)})) - f^* \\ &= rD_{\psi^*}(z^{(0)}, z^*) + \frac{s}{r}(f(\tilde{x}^{(1)}) - f^*)\end{aligned}$$

and we bound  $f(\tilde{x}^{(1)}) - f^*$ . By definition,  $\tilde{x}^{(1)} = \arg \min_{\tilde{x} \in E} \gamma s \langle \nabla f(x^{(1)}), \tilde{x} \rangle + R(\tilde{x}, x^{(1)})$  thus

$$\gamma s \langle \nabla f(x^{(1)}), \tilde{x}^{(1)} \rangle + R(\tilde{x}^{(1)}, x^{(1)}) \leq \gamma s \langle \nabla f(x^{(1)}), x^{(1)} \rangle \quad (10)$$

Therefore,

$$\begin{aligned}f(\tilde{x}^{(1)}) - f^* &\leq \langle \nabla f(x^{(1)}), \tilde{x}^{(1)} - x^* \rangle + \frac{L_f}{2} \|\tilde{x}^{(1)} - x^{(1)}\|^2 && \text{by Lemma 4} \\ &\leq \langle \nabla f(x^{(1)}), \tilde{x}^{(1)} - x^* \rangle + \frac{L_f}{\ell_R} R(\tilde{x}^{(1)}, x^{(1)}) && \text{by assumption on } R \\ &\leq \langle \nabla f(x^{(1)}), \tilde{x}^{(1)} - x^* \rangle + \frac{1}{\gamma s} R(\tilde{x}^{(1)}, x^{(1)}) - \frac{L_f}{\ell_R} R(\tilde{x}^{(1)}, x^{(1)}) \quad \text{using that } \frac{2L_f}{\ell_R} \leq \frac{1}{\gamma s} \\ &\leq \langle \nabla f(x^{(1)}), x^{(1)} - x^* \rangle - \frac{L_f}{\ell_R} R(\tilde{x}^{(1)}, x^{(1)}) && \text{by (10)} \\ &\leq f(x^{(1)}) - f^* + \frac{L_f}{2} \|x^{(1)} - x^*\|^2 - \frac{L_f}{\ell_R} R(\tilde{x}^{(1)}, x^{(1)}) && \text{by Lemma 4} \\ &\leq f(x^{(1)}) - f^*\end{aligned}$$

finally, observing that  $x^{(1)} = x_0$ , we have  $f(\tilde{x}^{(1)}) - f^* \leq f(x_0) - f^*$ , therefore

$$\tilde{E}^{(1)} \leq rD_{\psi^*}(z_0, z^*) + \frac{s}{r}(f(x_0) - f^*)$$

which proves the desired inequality.

## References

R.T. Rockafellar. *Convex Analysis*. Princeton University Press, 1970.
